# Supplementary material for: Design and synthesis of non-crystallizable, low-Tg polysiloxane elastomers with functional epoxy groups through anionic copolymerization and subsequent epoxidation
Source: Royal Society of Chemistry journal article supplement (doi:10.1039/c4ra02293a), 2014-01-01
Supplement: c4ra02293a1.pdf [file c4ra02293a1.pdf]

## Supporting Information

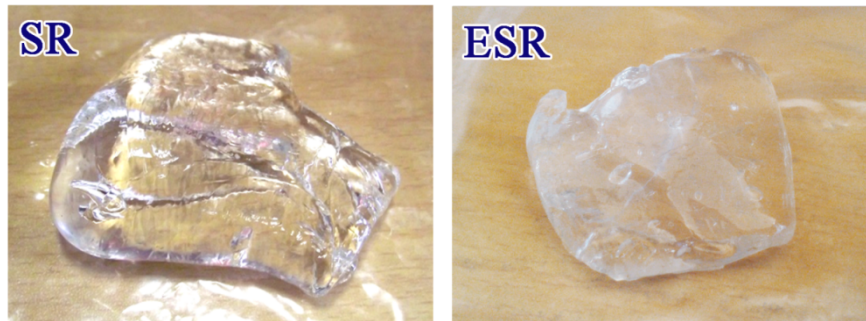

**Figure S1.** The photographs of SR and ESR.

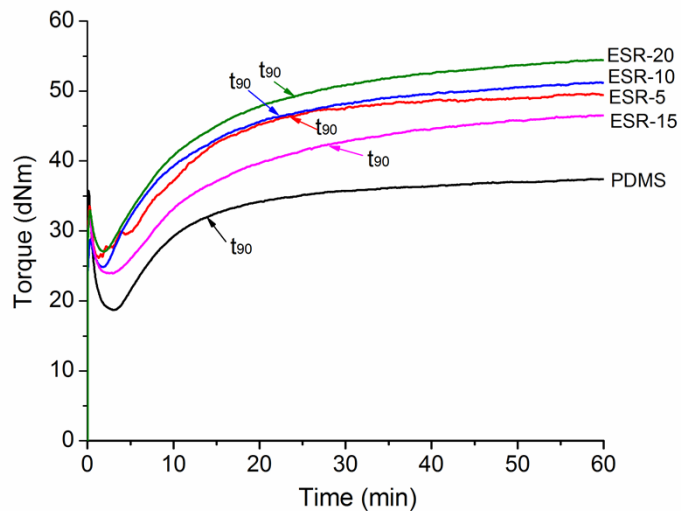

**Figure S2.** Curing curves of silica/PDMS blend and silica/ESR blends.

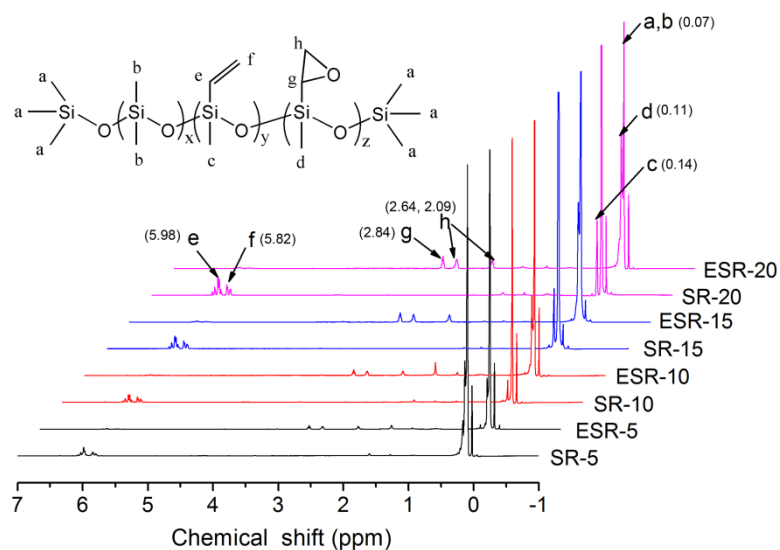

| Sample                               | SR-5   | SR-10  | SR-15  | SR-20  | ESR-5  | ESR-10 | ESR-15 | ESR-20 |
|--------------------------------------|--------|--------|--------|--------|--------|--------|--------|--------|
| Integral of $-\text{CH}_3$           | 1      | 1      | 1      | 1      | 1      | 1      | 1      | 1      |
| Integral of $-\text{CH}=\text{CH}_2$ | 0.0257 | 0.0526 | 0.0856 | 0.1130 | 0.0022 | 0.0035 | 0.0056 | 0.0079 |

**Figure S3.**  $^1\text{H}$  NMR spectra of SRs and ESRs.

**Table S4.** Thermal properties of PDMS, SRs and ESRs.

| Sample | $T_g$ (°C) | $T_c$ (°C) | $\Delta H_c$ (J/g) | $T_{cc}$ (°C) | $\Delta H_{cc}$ (J/g) | $T_m$ (°C) | $\Delta H_m$ (J/g) |
|--------|------------|------------|--------------------|---------------|-----------------------|------------|--------------------|
| PDMS   | -125.5     | -81.8      | 29.1               | -             | -                     | -43.1      | 29.1               |
| SR-5   | -125.8     | -86.6      | 25.4               | -             | -                     | -50.6      | 25.7               |
| SR-10  | -127.8     | -          | -                  | -94.8         | 19.3                  | -60.6      | 19.4               |
| SR-15  | -128.2     | -          | -                  | -             | -                     | -          | -                  |
| SR-20  | -128.8     | -          | -                  | -             | -                     | -          | -                  |
| ESR-5  | -123.2     | -          | -                  | -82.4         | 20.8                  | -50.2      | 21.2               |
| ESR-10 | -119.2     | -          | -                  | -             | -                     | -          | -                  |
| ESR-15 | -116.2     | -          | -                  | -             | -                     | -          | -                  |
| ESR-20 | -113.0     | -          | -                  | -             | -                     | -          | -                  |

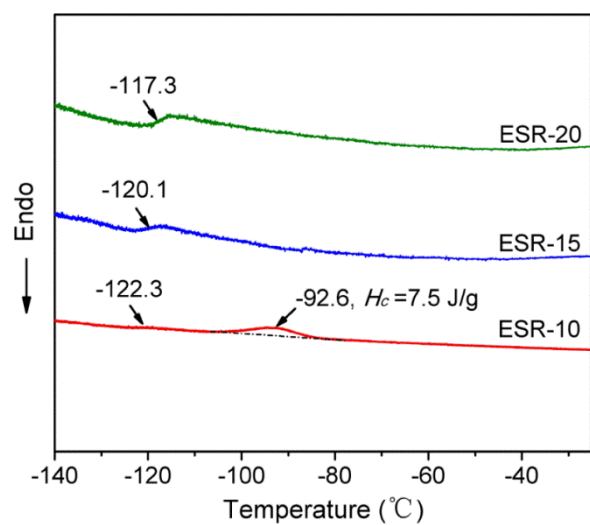

**Figure S5.** The DSC cooling curves of ESRs (cooling rate: 1°C/min).
